# Supplementary material
Source: ML conference proceedings conference paper supplement (https://openreview.net/forum?id=4QUoBU27oXN)
Supplement: supplementary_material [file attachment]

Instructions

1. Due to the large volume of the datasets and the trained models, we could not include them in the submitted version. Please, download the datasets that are available on public domain. Except the digit datasets that can be easily found, the ResNet features for the rest of datasets can be downloaded from the following address:

https://github.com/jindongwang/transferlearning/blob/master/data/dataset.md

1. We have run the code on a GPU cluster and using the tensorflow docker container. It is likely that the code cannot be run on a local machine due to the time constraints. So, please use a GPU cluster for testing. You may also need to change the folder addresses or generate the required folder address accordingly to your high performance computing cluster resource.
2. In each folder of the tasks, there is a Jupyter notebook which has been written quite self-explanatory. Since, we could not include the trained models, you should run the code ten times and then compute the average.
